# Supplementary material for: Oxyresveratrol extracted fromArtocarpus heterophyllusLam. inhibits tyrosinase and age pigmentsin vitroandin vivo
Source: Royal Society of Chemistry journal article supplement (doi:10.1039/d0fo01193b), 2020-01-01
Supplement: d0fo01193b1.pdf [file d0fo01193b1.pdf]

## **Supplement materials**

### **Figure captions:**

**Figure S1. HPLC spectrogram of a standard OXY sample**

**Figure S2. FTIR spectrogram of an extracted OXY sample**

**Figure S3. OXY HPLC-MS spectrometry**

**Figure S4. OXY NMR spectra**

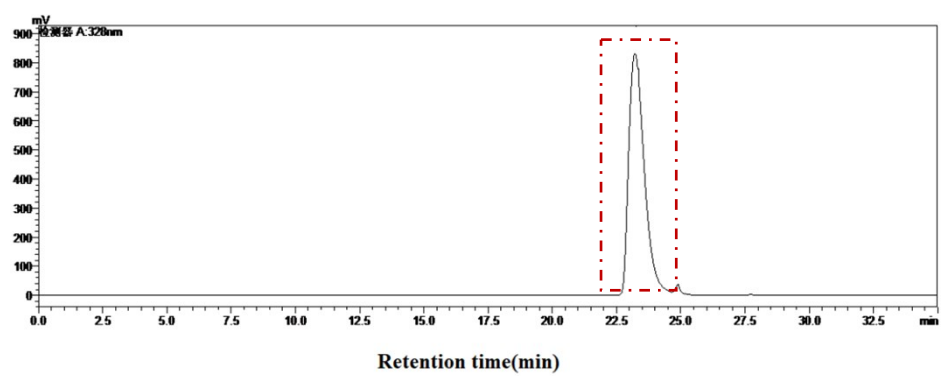

**Figure S1.**

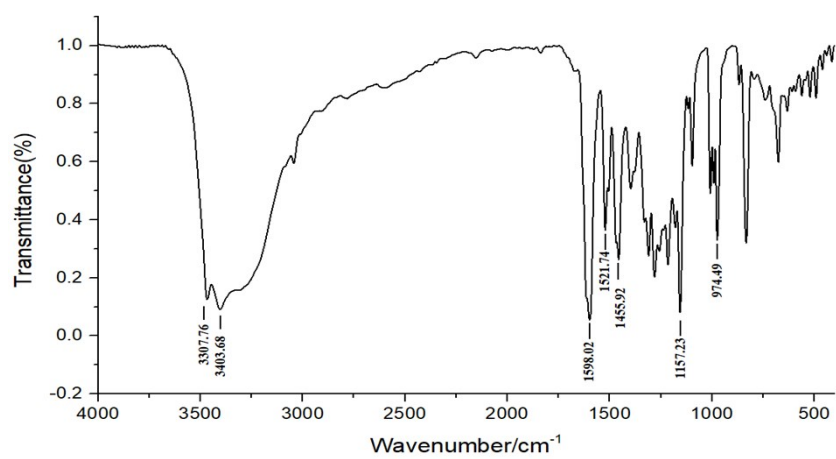

**Figure S2.**

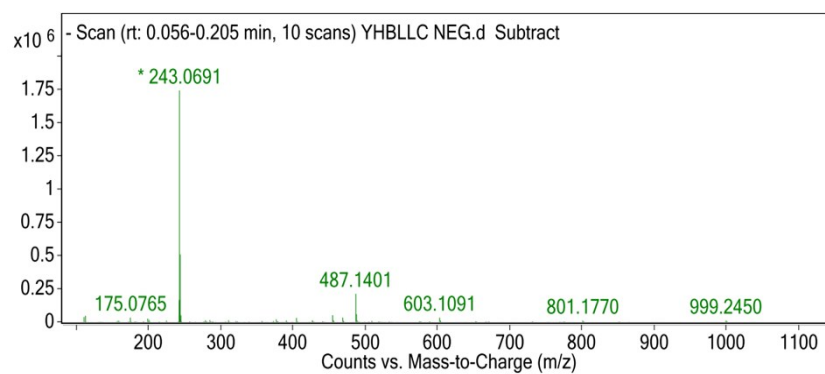

A. Negative Ion Spectrograph

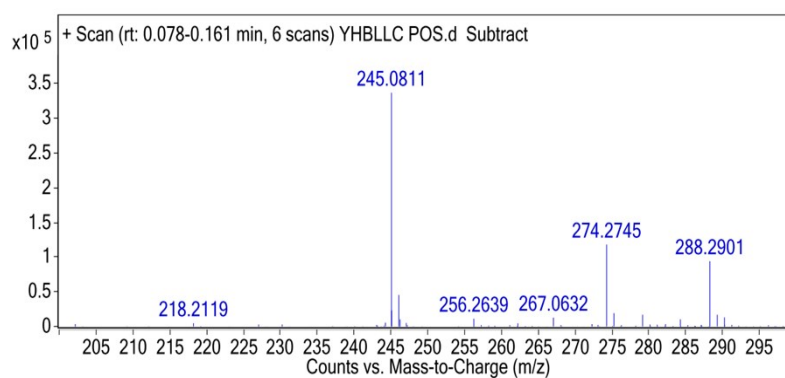

B. Positive Ion Spectrograph

**Figure S3.**

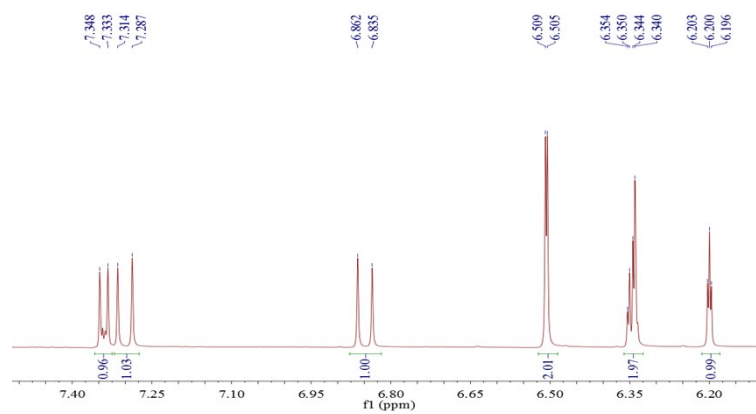

A. <sup>1</sup>H-NMR

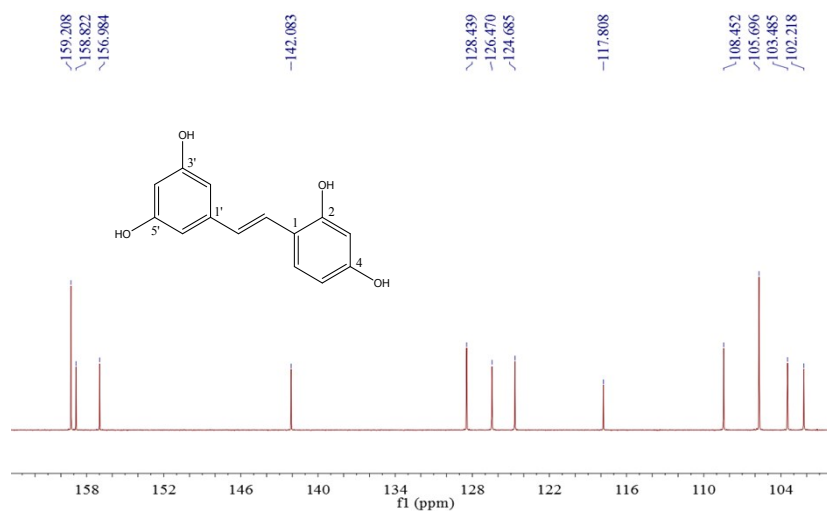

B. <sup>13</sup>C-NMR

Figure S4.
